# Supplementary material
Source: PubMed Central journal article supplement (PMC4739676)
Supplement: 10.1074_M115.051250_mcp.M115.051250-1.pdf [file 10.1074_M115.051250_mcp.M115.051250-1.pdf]

## **Supplemental materials and methods**

### **Tissue microarray analysis**

Tissue microarrays (TMAs) specific for gastric cancer containing 31 different paired samples (Gastric cancer and healthy), and tissue microarrays containing 30 samples of 6 types of digestive tract tumors, 5 for each, i.e., gastric cancer, esophagus cancer, colon cancer, rectal cancer, liver cancer and pancreatic cancer were purchased from Shanghai Outdo Biotech Company (Shanghai, China). The tissue samples on the TMAs that we used in this study were all collected from hospitals in Shanghai, China. All the patients had been given informed consent and the collection of tissue samples for research was approved by the ethics committee. The immunohistochemistry (IHC) assay was performed as described [1]. Briefly, sections were cut at a thickness of 4  $\mu\text{m}$  and dried for 16 h at 56  $^{\circ}\text{C}$  before being dewaxed in xylene and rehydrated through graded ethanol series to water. A heat-induced epitope retrieval step was performed in 0.01 M trisodium citrate solution with heating for 5 min in an induction cooker. After heating, slides were incubated in blocking buffer for 15 min and quickly washed in TBS (pH=7.4). Then TMAs were incubated with mouse rabbit polyclonal to anti-COPS2 (Abcam, Cambridge, USA) and mouse polyclonal to anti-CTSF (R&D, Minneapolis, USA). Specific binding was followed by anti-IgG conjugated with biotin for 1 hr, incubated with horseradish peroxidase (HRP)-conjugated streptavidin and the signal was visualized by using a DAB protein kit (Sigma-Aldrich Inc., Shanghai, China). The specimens were analyzed under a light microscope (Nikon, Tokyo, Japan) by pathologists. The staining intensity was defined from 0 to 4 based on the color shades of

IHC staining performed by two independent pathologists. Statistical analysis was performed by one-tailed Student's t test.

1. Babel I., Barderas R., D íaz-Uriarte R., Mart ínez-Torrecuadrada JL., S ánchez-Carbayo M., Casal JI. (2012) Identification of tumor-associated autoantigens for the diagnosis of colorectal cancer in serum using high density protein microarrays. *Mol Cell Proteomics*. **8**, 2382-95.

## **Supplemental Table S1. Eligibility Criteria for Selection of the Subjects.**

---

### **General inclusion criteria**

1. Age  $\geq$  30 years and  $\leq$  90 years
2. Not currently residing in an institution, such as a prison, nursing home, or shelter
3. Not severely ill in the intensive care unit
4. With the capability to give informed consent
5. Encountered between August 2008 and June 2013

### **Healthy donors ( healthy group)**

1. Had the medical check-up in Ruijin Hospital
2. In healthy condition without malignancy
3. Blood routine examination is normal

### **Gastric cancer patients (GC group)**

1. With surgery treatment
2. Confirmed by pathologic examination result
3. Diagnosed by two experienced pathologists
4. No pre-operative chemotherapy, radiotherapy, transarterial chemoembolization or ablation

### **GU/GP/CAG group**

1. With the signs and symptoms of gastritis
  2. With *Helicobacter pylori* (Hp) detection
  3. With gastroscopy Examination
  4. Pathological examination result is gastric polyp, intraepithelial neoplasia, gastric epithelial dysplasia, or intestinal metaplasia with diagnosis of chronic superficial gastritis, chronic atrophic gastritis, or gastric ulcer
  5. Diagnosed by two experienced pathologists
-

**Supplemental Table S2. Serum samples collected from 7 Hospitals.**

| <b>Hospital</b>                                            | <b>Gastric cancer</b> | <b>Healthy</b> |
|------------------------------------------------------------|-----------------------|----------------|
| Ruijin Hospital                                            | 220                   | 231            |
| the First Affiliated Hospital of Fujian Medical University | 102                   | 110            |
| Shanghai East Hospital                                     | 28                    | 27             |
| Tongren Hospital                                           | 33                    | 30             |
| Shanghai Putuo Center Hospital                             | 23                    | 25             |
| Shanghai Pudong Gongli Hospital                            | 32                    | 22             |
| the Shanghai Fifth People's Hospital                       | 99                    | 105            |
| <b>Total</b>                                               | <b>537</b>            | <b>550</b>     |

**Supplemental Table S3.** Candidate proteins identified by human proteome microarray using 87 serum samples.

| Name     | UniProt ID. | *SNR (Cancer) | *SNR (Healthy) | P value (Cancer/Healthy) | **Fold change (Cancer/Healthy) |
|----------|-------------|---------------|----------------|--------------------------|--------------------------------|
| ZBTB5    | O15062      | 3.01          | 2.15           | <0.001                   | 1.83                           |
| ARL6IP4  | Q66PJ3      | 3.24          | 3.16           | <0.001                   | 1.59                           |
| SIAH1    | Q8IUQ4      | 3.28          | 1.73           | 0.001                    | 1.54                           |
| ATG10    | Q9H0Y0      | 3.14          | 2.94           | <0.001                   | 1.48                           |
| SPRR1A   | P35321      | 3.71          | 2.22           | <0.001                   | 1.48                           |
| OR5BU1   | A6ND48      | 3.59          | 3.26           | <0.001                   | 1.46                           |
| COPS2    | P61201      | 3.29          | 1.92           | 0.004                    | 1.45                           |
| NMI      | Q13287      | 3.01          | 2.41           | <0.001                   | 1.43                           |
| PPIL6    | Q8IXY8      | 3.10          | 2.79           | <0.001                   | 1.43                           |
| NT5E     | P21589      | 3.35          | 2.86           | 0.002                    | 1.43                           |
| TERF1    | P54274      | 3.46          | 3.32           | <0.001                   | 1.42                           |
| SLC22A24 | Q8N4F4      | 3.18          | 3.07           | 0.004                    | 1.42                           |
| PIGU     | Q9H490      | 3.32          | 2.74           | <0.001                   | 1.40                           |
| CTSF     | Q9UBX1      | 3.53          | 2.68           | <0.001                   | 1.40                           |
| ESCO1    | Q5FWF5      | 3.00          | 2.78           | 0.002                    | 1.40                           |
| SYT3     | Q9BQG1      | 3.26          | 3.06           | <0.001                   | 1.40                           |
| C17orf63 | Q8WU58      | 3.73          | 2.16           | <0.001                   | 1.40                           |

SNR for each group (Healthy and Cancer) was defined as the ratio of the difference between normalized intensities.

$$SNR = \frac{I - \sigma}{\sigma} \quad I \text{ is the normalized intensity and } \sigma \text{ is its variation.}$$

\*SNR=Log10(SNR).

\*\*Fold change= SNR(Cancer)/ SNR(Healthy)

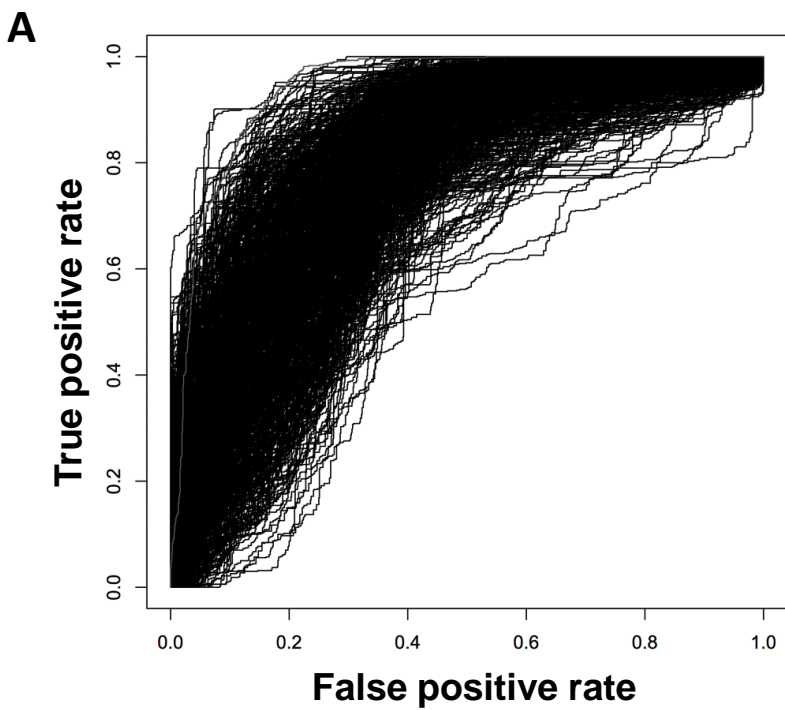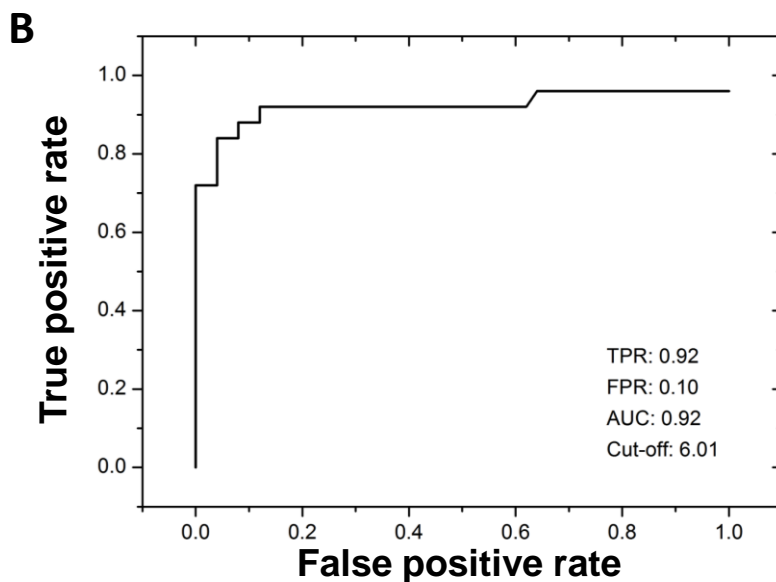

**Supplemental Figure S1.** Receiver operating characteristic curve analysis of the computational cross validation using the 4-marker panel. (A) The 100 splits, (B) The best model and the classifier. Based on the cross validation, a best model  $((0.835 \times \text{expression level of COPS2}) + (0.792 \times \text{expression level of CTSF}) + (0.817 \times \text{expression level of NT5E}) + (0.671 \times \text{expression level of TERF1}))$  was generated according to the linear combination of the final 4 candidates using multiple linear regression in “lm” package implemented in R.

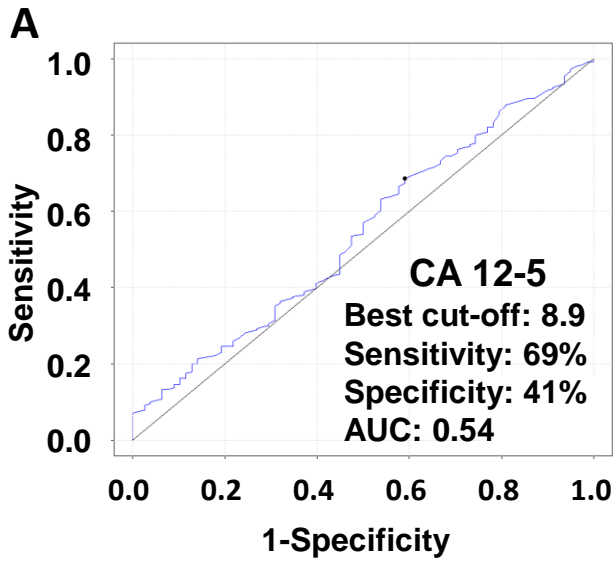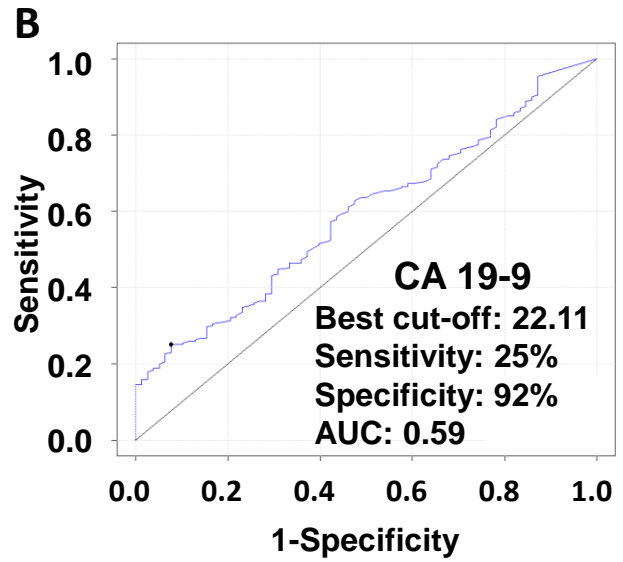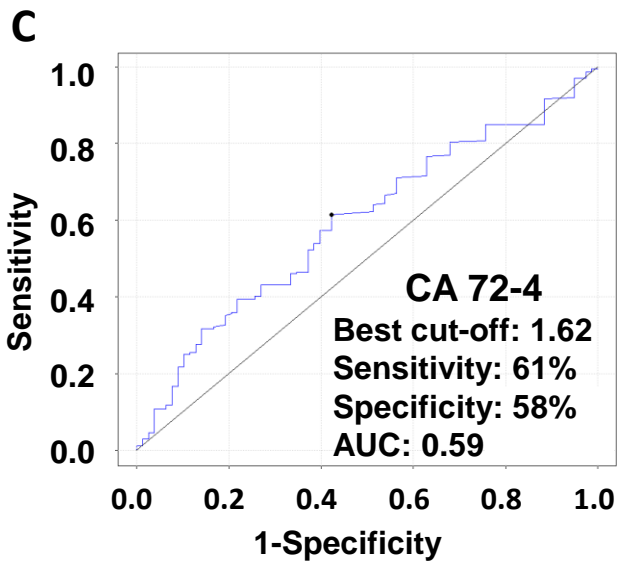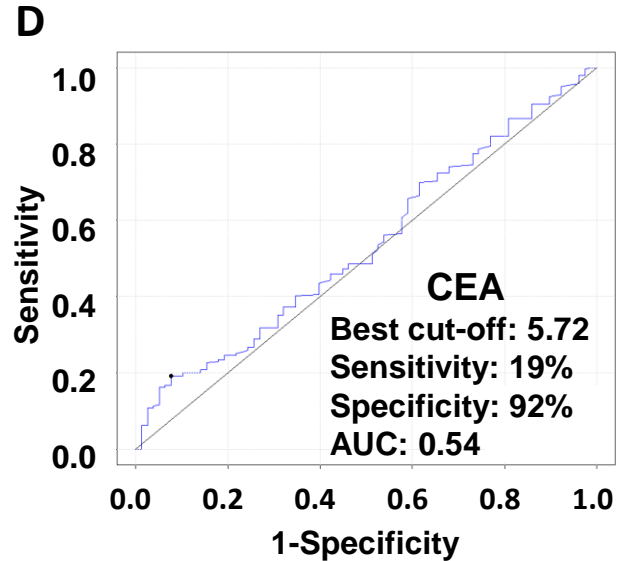

**Supplemental Figure S2.** Receiver operating characteristic curve analysis of the four routinely used serum biomarkers for gastric cancer diagnosis: (A) CA 12-5, (B) CA 19-9, (C) CA 72-4, and (D) CEA. The data for this analysis were obtained by ELISA.

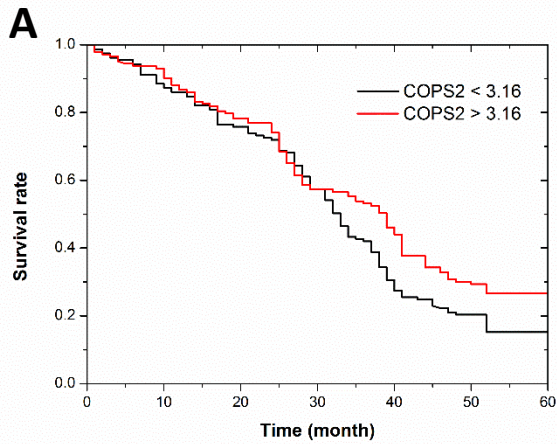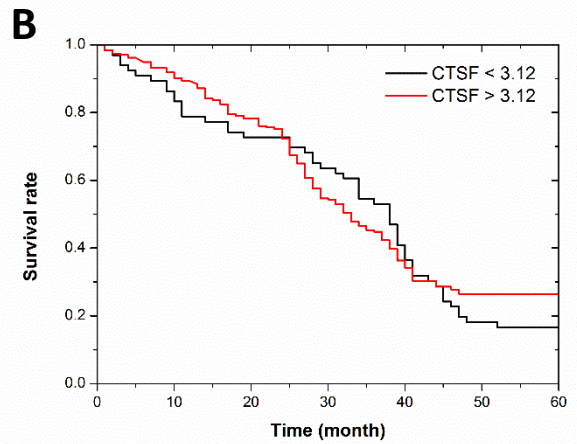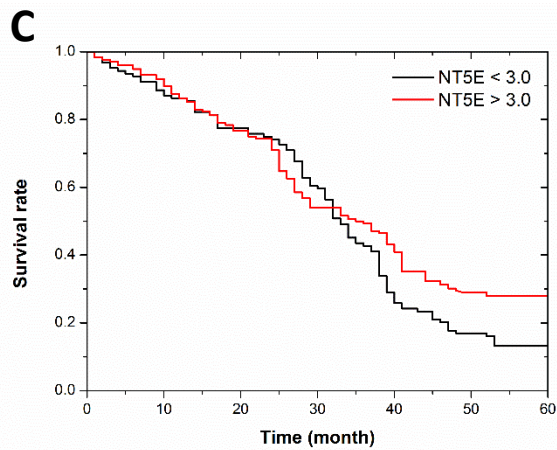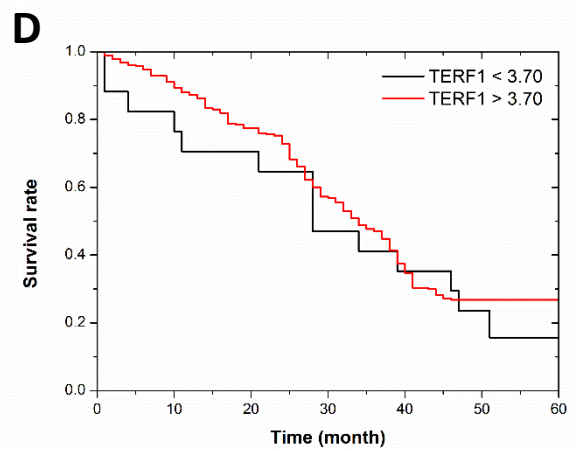

**Supplemental Figure S3.** Kaplan-Meier Survival curve. (A) COPS2, (B) CTSF, (C) NT5E and (D) TERF1.



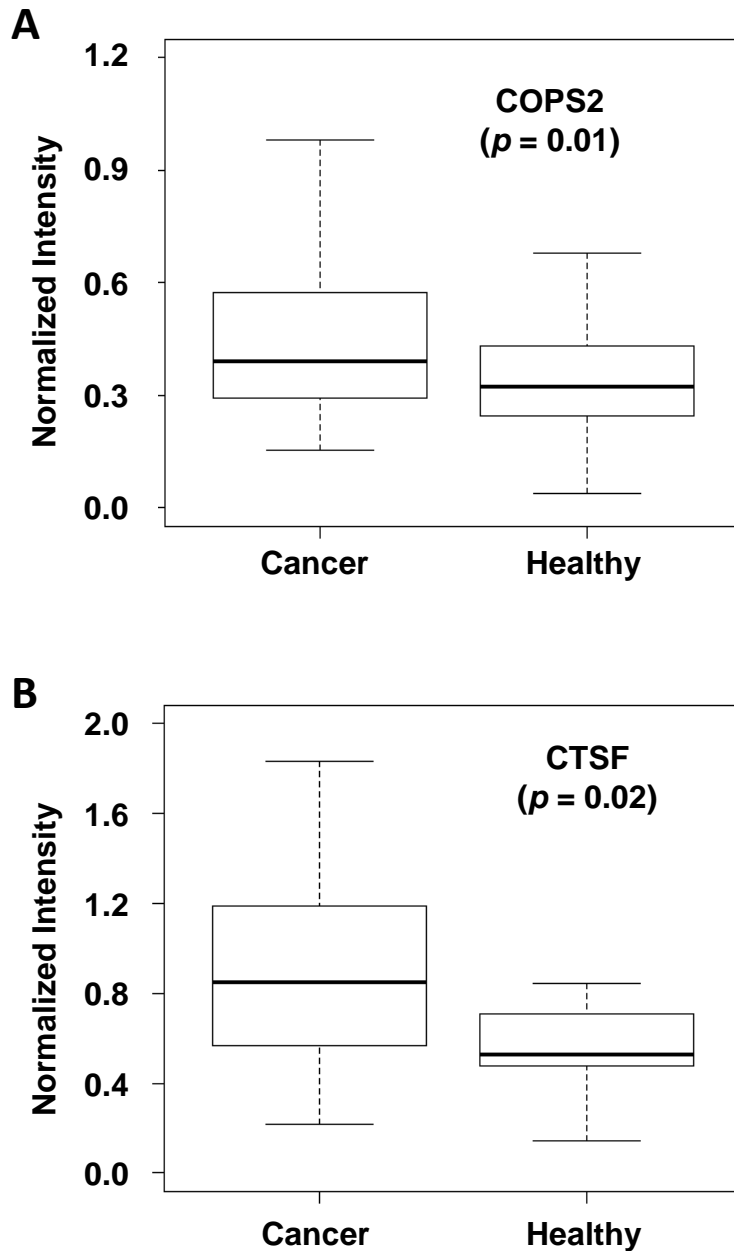

**Supplemental Figure S4.** Reactivity of the two serum biomarkers with sera of ELISA validation phase I (100 healthy people and 100 GC patients). (A) COPS2, and (B) CTSF.

**A****COPS2**

Gastric cancer

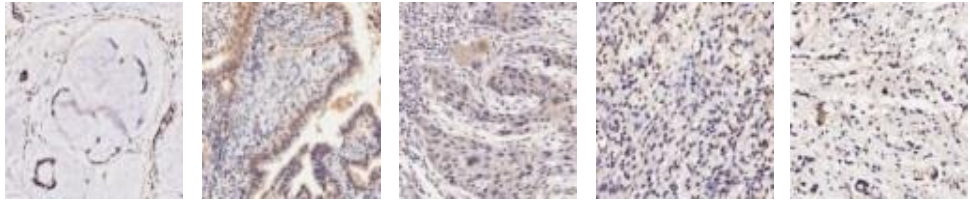

Healthy

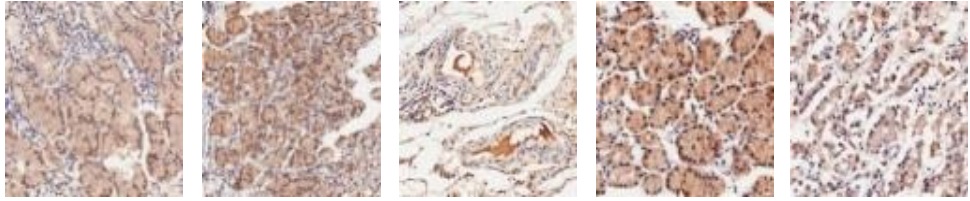**B****CTSF**

Gastric cancer

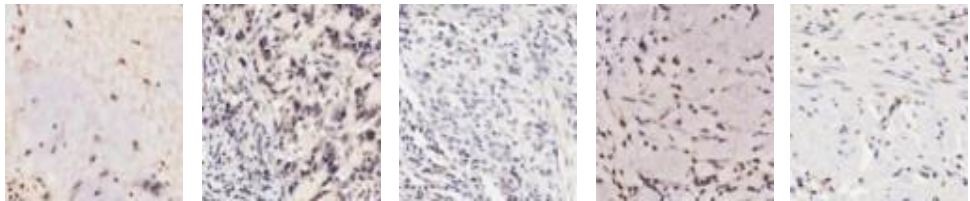

Healthy

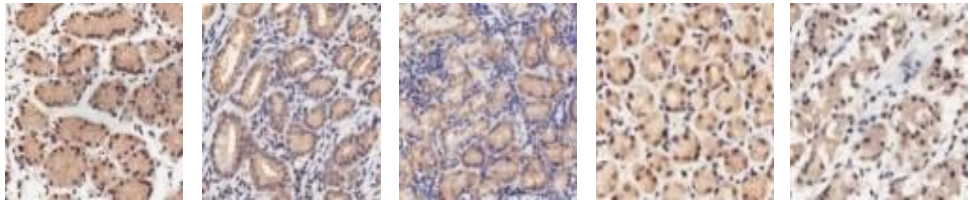**C**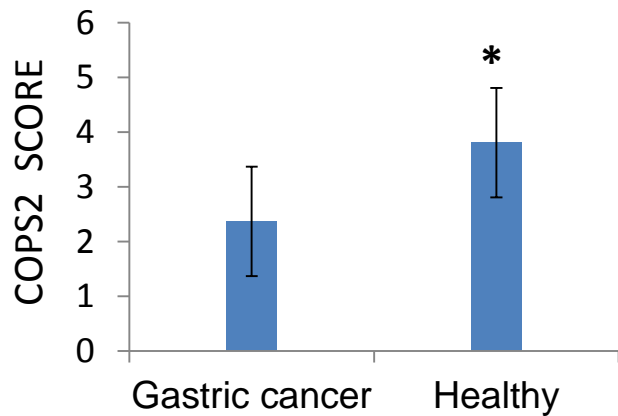**D**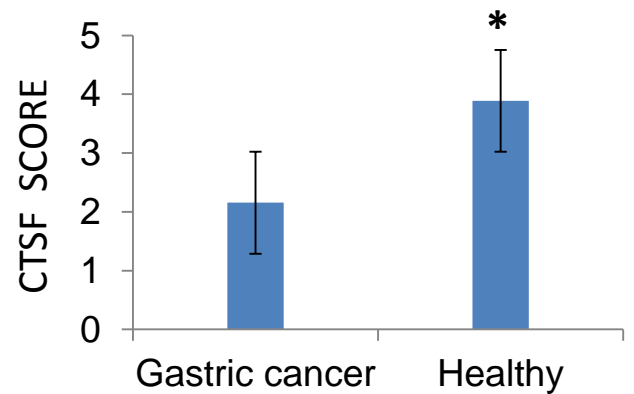

**Supplemental Figure S5.** Tissue microarray analysis with anti-COPS2 and anti-CTSF. Immuno-staining with anti-COPS2 (A,C), and anti-CTSF (B,D).

## A. COPS2

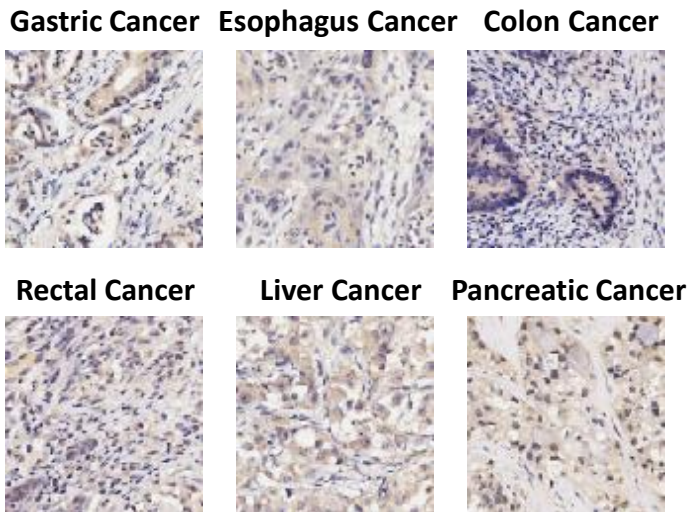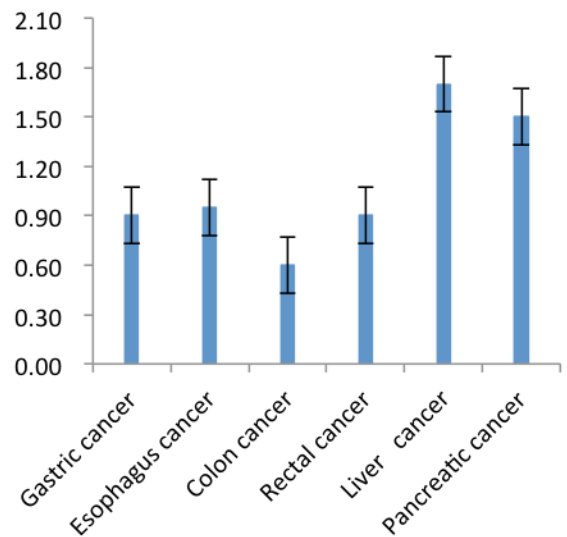

## B. CTSF

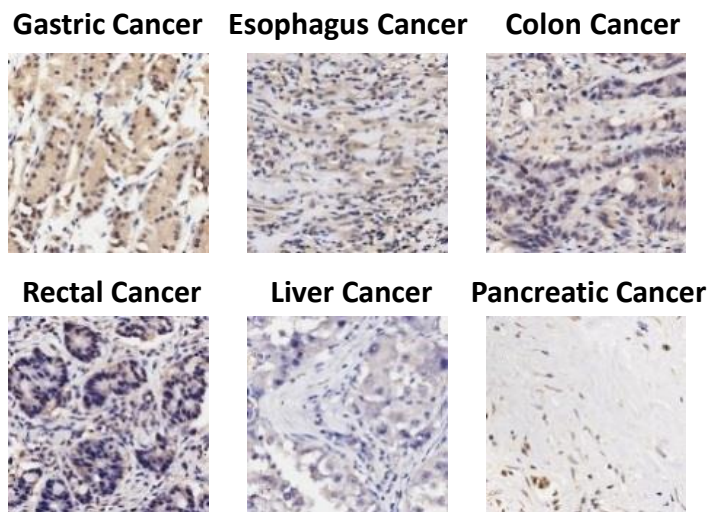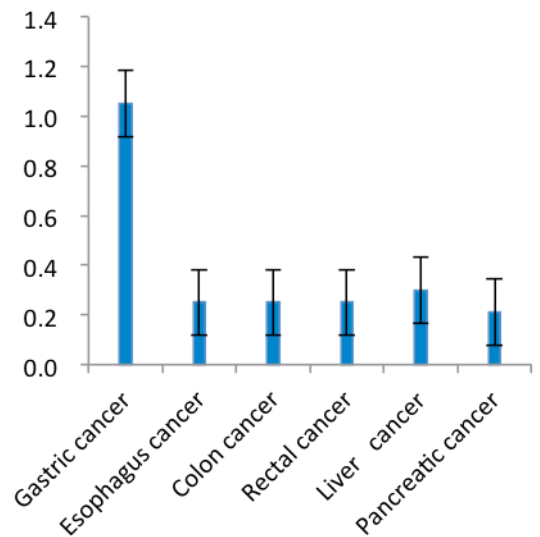

**Supplemental Figure S6.** Tissue microarray analysis with anti-COPS2 and anti-CTSF for testing the gastric cancer specificity on 6 types of digestive tract tumors.
